# Supplementary material for: Time-resolved XAS studies reveal sequential oxidative–reductive formation of Na-doped iridium oxide films with enhanced bio-stimulating performance
Source: Royal Society of Chemistry journal article supplement (doi:10.1039/d2tc02996k), 2023-01-01
Supplement: d2tc02996k1.pdf [file d2tc02996k1.pdf]

## Electronic Supplementary Information (ESI) for Journal of Materials Chemistry C

### Time-resolved XAS studies reveal sequential oxidative-reductive formation of Na-doped iridium oxide film with enhanced bio-stimulating performance

Kuang-Chih Tso,<sup>a,b</sup> Yi-Chieh Hsieh,<sup>c</sup> Jyh-Fu Lee,<sup>d</sup> Chih-Wen Pao,<sup>d</sup> Po-Chun Chen,<sup>e</sup>

Jun Ohta<sup>b</sup> and Pu-Wei Wu<sup>\*,c</sup>

<sup>a</sup> Graduate Program of Accelerator Light Source, National Yang Ming Chiao Tung University, Hsinchu 300, Taiwan

<sup>b</sup> Division of Materials Science, Graduate School of Science and Technology, Nara Institute of Science and Technology, 8916-5 Takayama, Ikoma, Nara 630-0192, Japan

<sup>c</sup> Department of Materials Science and Engineering, National Yang Ming Chiao Tung University, Hsinchu 300, Taiwan

<sup>d</sup> National Synchrotron Radiation Research Center, Hsinchu 300, Taiwan

<sup>e</sup> Institute of Materials Science and Engineering, National Taipei University of Technology, Taipei 106, Taiwan

\*Corresponding author at:

Department of Materials Science and Engineering, National Yang Ming Chiao Tung University, Hsinchu 300, Taiwan

E-mail address: [ppwu@nycu.edu.tw](mailto:ppwu@nycu.edu.tw)

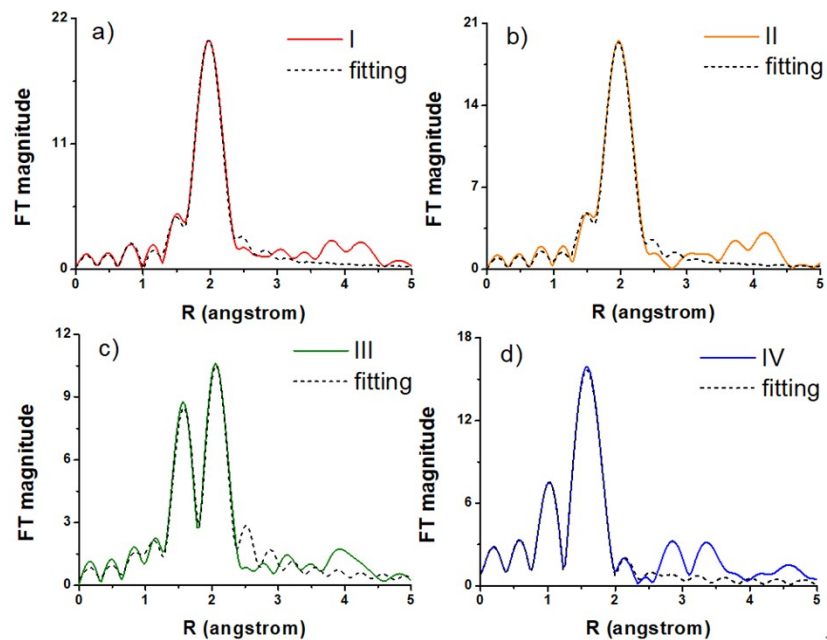

**Fig. S1** The  $k^3$ -weighted Fourier-transformed EXAFS profiles of Ir L<sub>3</sub>-edge and their respective fitting curves for chemical baths in four distinct stages; a) I: K<sub>3</sub>IrCl<sub>6</sub> aqueous solution, b) II: K<sub>3</sub>IrCl<sub>6</sub> aqueous solution mixed with KNaC<sub>4</sub>H<sub>4</sub>O<sub>6</sub>, c) III: K<sub>3</sub>IrCl<sub>6</sub> aqueous solution mixed with KNaC<sub>4</sub>H<sub>4</sub>O<sub>6</sub> and NaOH, and d) IV: K<sub>3</sub>IrCl<sub>6</sub> aqueous solution mixed with KNaC<sub>4</sub>H<sub>4</sub>O<sub>6</sub>, NaOH, and NaClO.

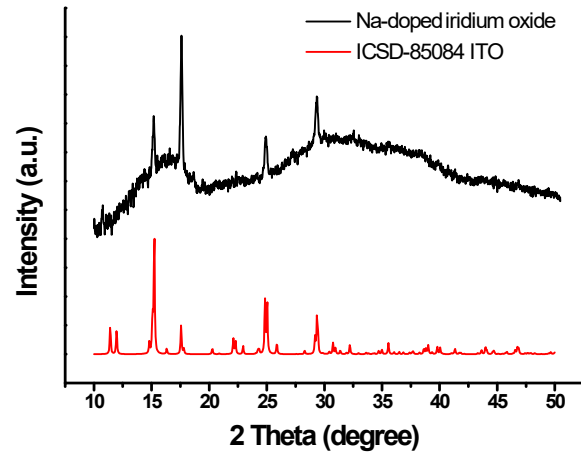

**Fig. S2** The XRD pattern of Na-doped iridium oxide and ITO standard.

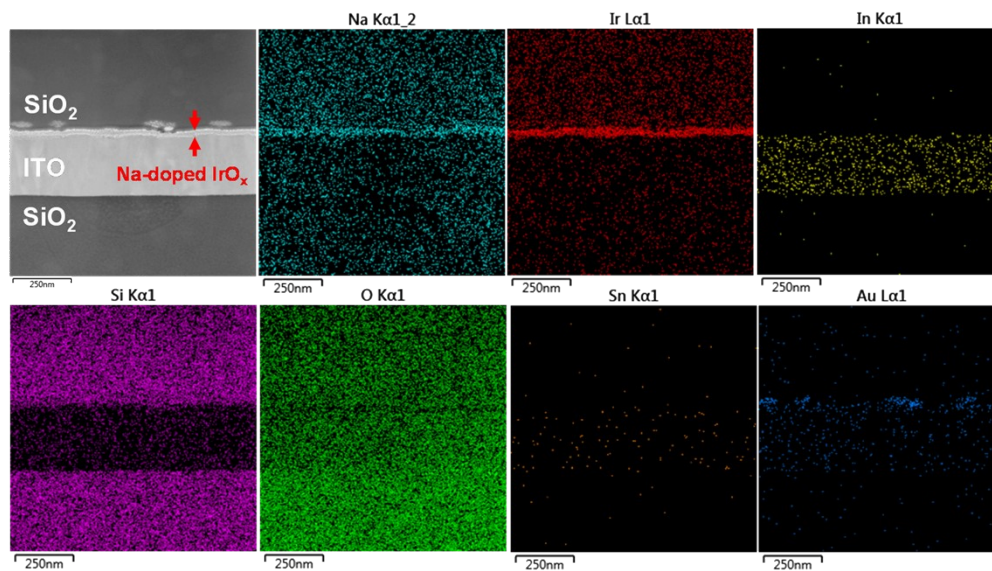

**Fig. S3** The TEM image with EDS mapping profiles of Na-doped iridium oxide.

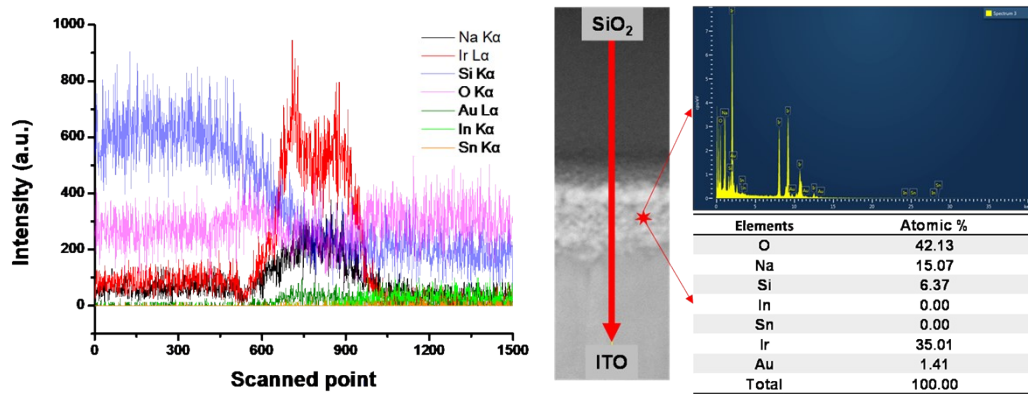

Fig. S4 The TEM/EDS line and point scans for Na-doped iridium oxide.

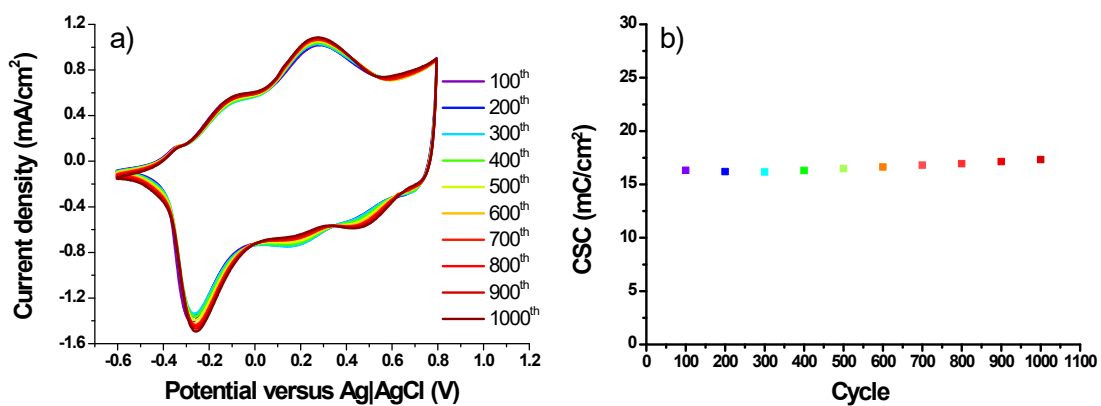

**Fig. S5** a) The CV profiles of Na-doped iridium oxide for 1,000 cycles. b) The corresponding CSC as a function of CV cycles.

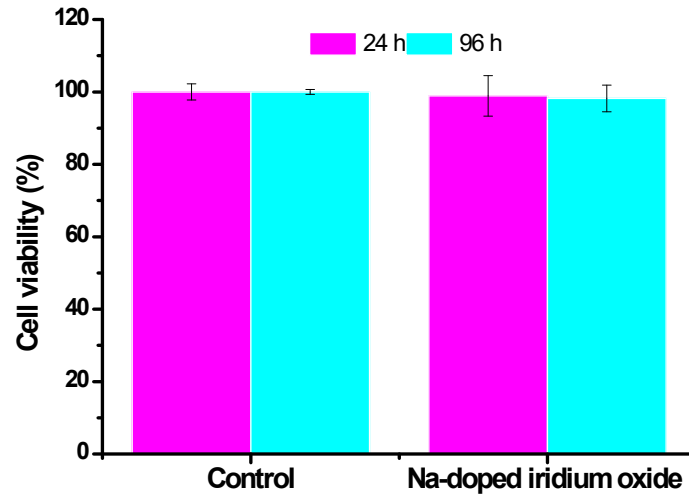

**Fig. S6** The cell viability of Na-doped iridium oxide and control group (glass substrate) for 24 and 96 h, respectively.

**Table S1** The edge energy shift of Ir L<sub>3</sub>-edge XANES profiles from chemical baths in different stages.

| Stage | Edge energy shift (subtracted by the absorption energy of standard IrO <sub>2</sub> ) |
|-------|---------------------------------------------------------------------------------------|
| I     | -1.93 eV                                                                              |
| II    | -1.70 eV                                                                              |
| III   | -1.54 eV                                                                              |
| IV    | 0.84 eV                                                                               |



**Table S2** The fitting parameters of Ir L<sub>3</sub>-edge EXAFS profiles from chemical baths in different stages.

| Stage | Path                            | N <sup>a</sup> | R (Å) <sup>b</sup> | $\Delta\sigma_j^2 (\times 10^{-3} \text{ \AA}^2)^c$ | R-factor <sup>d</sup> |
|-------|---------------------------------|----------------|--------------------|-----------------------------------------------------|-----------------------|
| I     | Ir-O <sup>e</sup>               | 1              | 2.04               | 3.1                                                 | 0.013                 |
|       | Ir-Cl                           | 5              | 2.35               | 3.1                                                 |                       |
| II    | Ir-O <sup>e</sup>               | 1              | 2.04               | 11.4                                                | 0.005                 |
|       | Ir-O <sup>f</sup>               | 1              | 2.06               | 11.4                                                |                       |
|       | Ir-Cl                           | 4              | 2.35               | 2.3                                                 |                       |
| III   | Ir-O <sup>f</sup>               | 1              | 2.06               | 4.2                                                 | 0.006                 |
|       | Ir-O <sup>g</sup>               | 3              | 2.03               | 4.2                                                 |                       |
|       | Ir-Cl                           | 2              | 2.37               | 0.9                                                 |                       |
| IV    | Ir <sup>V</sup> -O <sup>h</sup> | 1              | 1.67               | 2.8                                                 | 0.002                 |
|       | Ir-O <sup>g</sup>               | 5              | 1.96               | 2.0                                                 |                       |

a: coordination number, b: bonding distance, c: Debye-Waller factor, d: difference between data and fitting, e: Ir-O<sup>e</sup>H<sub>2</sub>, f: Ir-O<sup>f</sup>OC(OH)C<sub>2</sub>H<sub>2</sub>(OH)COO<sup>-</sup>, g: Ir-O<sup>g</sup>H, h: Ir=O<sup>h</sup>.

**Table S3** The fitting parameters of XPS profiles and their fitting results for Na-doped iridium oxide.

|                  | Peak              | FWHM (eV) | Binding energy (eV) | Area     |
|------------------|-------------------|-----------|---------------------|----------|
| Ir <sup>5+</sup> | 4f <sub>5/2</sub> | 2.10      | 66.80               | 3,273.05 |
|                  | 4f <sub>7/2</sub> | 2.10      | 63.80               | 4,364.06 |
| Ir <sup>4+</sup> | 4f <sub>5/2</sub> | 1.00      | 65.45               | 2,102.39 |
|                  | 4f <sub>7/2</sub> | 1.00      | 62.45               | 2,803.19 |
|                  | 4f satellite      | 2.20      | 65.90               | 2,851.25 |
|                  | 4f satellite      | 2.20      | 62.90               | 3,801.66 |
|                  | 4f satellite      | 3.88      | 67.80               | 1,366.88 |
| Na <sup>+</sup>  | 2s                | 2.00      | 65.80               | 6,46.24  |
| O <sup>2-</sup>  | 1s                | 2.00      | 530.50              | 7,006.80 |
| OH <sup>-</sup>  | 1s                | 2.00      | 531.60              | 7,741.20 |
| H <sub>2</sub> O | 1s                | 2.00      | 532.90              | 1,439.10 |

**Table S4** The fitting parameters of Ir L<sub>3</sub>-edge EXAFS profile for Na-doped iridium oxide.

| Sample                    | Path              | N <sup>a</sup> | R (Å) <sup>b</sup> | $\Delta\sigma_j^2 (\times 10^{-3} \text{ \AA}^2)^c$ | R-factor <sup>d</sup> |
|---------------------------|-------------------|----------------|--------------------|-----------------------------------------------------|-----------------------|
| Na-doped IrO <sub>x</sub> | Ir-O <sub>1</sub> | 1.73           | 1.93               | 3.7                                                 | 0.009                 |
|                           | Ir-O <sub>2</sub> | 3.45           | 1.97               | 3.7                                                 |                       |
|                           | Ir-Ir             | 1.73           | 3.09               | 15.6                                                |                       |
|                           | Ir-Na             | 1.73           | 3.22               | 1.2                                                 |                       |
| hydrous <sup>e</sup>      | Ir-O <sub>1</sub> | 1.49           | 1.98               | 4.8                                                 | 0.001                 |
|                           | Ir-O <sub>2</sub> | 2.98           | 2.01               | 4.8                                                 |                       |
| pristine <sup>f</sup>     | Ir-O <sub>1</sub> | 1.60           | 1.96               | 2.3                                                 | 0.009                 |
|                           | Ir-O <sub>2</sub> | 3.20           | 1.99               | 2.3                                                 |                       |

a: coordination number, b: bonding distance, c: Debye-Waller factor, d: difference between data and fitting, e: standard hydrous IrO<sub>2</sub>, f: standard pristine IrO<sub>2</sub>, Ir-O<sub>1</sub>: apical bond, Ir-O<sub>2</sub>: planar bond.

**Table S5** The impedance fitting results for Na-doped iridium oxide and sputtered iridium

|                         | $R_s^a$ ( $\Omega$ ) | $R_{ct}^b$ ( $\Omega$ ) |
|-------------------------|----------------------|-------------------------|
| Na-doped iridium oxide  | 139.1                | 12.35                   |
| Sputtered iridium oxide | 138.3                | 120.2                   |

oxide.

a: electrolyte resistance; b: charge transfer resistance
